## Correction: THBS2 as a prognostic biomarker for patients diagnosed with metastatic pancreatic ductal adenocarcinoma

Phyllis A. Gimotty<sup>1,\*</sup>, Jacob E. Till<sup>2,\*</sup>, Shirsa Udgata<sup>3</sup>, Naomi Takenaka<sup>3</sup>, Stephanie S. Yee<sup>2</sup>, Michael J. LaRiviere<sup>4</sup>, Mark H. O'Hara<sup>2</sup>, Kim A. Reiss<sup>2</sup>, Peter O'Dwyer<sup>2</sup>, Bryson W. Katona<sup>5</sup>, Daniel Herman<sup>6</sup>, Erica L. Carpenter<sup>2,\*\*</sup> and Kenneth S. Zaret<sup>3,\*\*</sup>

<sup>1</sup>Division of Biostatistics, Department of Biostatistics, Epidemiology, and Informatics, Abramson Cancer Center, Perelman School of Medicine, University of Pennsylvania, Philadelphia, PA, USA

<sup>2</sup>Division of Hematology-Oncology, Department of Medicine, Abramson Cancer Center, Perelman School of Medicine, University of Pennsylvania, Philadelphia, PA, USA

<sup>3</sup>Institute for Regenerative Medicine, Department of Cell and Developmental Biology, Abramson Cancer Center, Perelman School of Medicine, University of Pennsylvania, Philadelphia, PA, USA

<sup>4</sup>Department of Radiation Oncology, University of Pennsylvania Perelman School of Medicine, Philadelphia, PA, USA

<sup>5</sup>Division of Gastroenterology, Department of Medicine, University of Pennsylvania Perelman School of Medicine, Philadelphia, PA, USA

<sup>6</sup>Department of Pathology and Laboratory Medicine, University of Pennsylvania, Philadelphia, PA, USA

\*These authors contributed equally to this work

\*\*Co-corresponding authors

**Published:** November 02, 2022

**Copyright:** © 2022 Gimotty et al. This is an open access article distributed under the terms of the [Creative Commons Attribution License](#) (CC BY 3.0), which permits unrestricted use, distribution, and reproduction in any medium, provided the original author and source are credited.

**This article has been corrected:** Authors Kenneth S. Zaret and Erica L. Carpenter contributed equally as corresponding authors. The footnote to the author list indicating both individuals as co-corresponding authors was unintentionally omitted. The proper footnote is shown below:

\*\*Co-corresponding authors

In addition, the paper's title has been corrected to read, 'THBS2 as a prognostic biomarker for patients diagnosed with metastatic pancreatic ductal adenocarcinoma.' The authors declare that these corrections do not change the results or conclusions of this paper.

Original article: Oncotarget. 2021; 12:2266–2272. <https://doi.org/10.18632/oncotarget.28099>
